# Supplementary material for: A Study of the Potential Anti-Inflammatory Drugs Chalcone Derivatives through the Combination of NMR Spectroscopy and Molecular Modeling
Source: Preprints.org preprint supplement (doi:10.20944/preprints202411.0126.v1), 2024-11-04
Supplement: Supplementary file 1 [file supplementary]

**SUPPORTING INFORMATION**

**A study of the potential anti-inflammatory drugs chalcone derivatives through the combination of NMR spectroscopy and molecular modeling**

Nikitas Georgiou1, Andromachi Tzani2, Kyriaki Vavougyiou1, Christos Papadopoulos3, Nikolaos Eleftheriadis3, Primoz Sket4, Demeter Tzeli5,6, Tuomas Niemi-Aro7, Anastasia Detsi2, Thomas Mavromoustakos1*

1Laboratory of Organic Chemistry, Department of Chemistry, National and Kapodistrian University of Athens, Panepistimioupolis Zografou, 11571 Athens, Greece

bLaboratory of Organic Chemistry, Department of Chemical Sciences, School of Chemical Engineering, National Technical University of Athens, Heroon Polytechniou 9, Zografou Campus, 15780 Athens, Greece

3Department of Chemistry, University of Crete, Voutes, 70013 Heraklion, Greece

4Slovenian NMR Centre, National Institute of Chemistry, SI-1001 Ljubljana, Slovenia

5Laboratory of Physical Chemistry, Department of Chemistry, National and Kapodistrian University of Athens, Panepistimioupolis Zografou, 11571 Athens, Greece

6Theoretical and Physical Chemistry Institute, National Hellenic Research Foundation, 48 Vassileos Constantinou Ave., 11635 Athens, Greece

7Institute of Biotechnology, Helsinki Institute of Life Sciences, P.O 65 (Viikinkaari 1), 00014 University of Helsinki


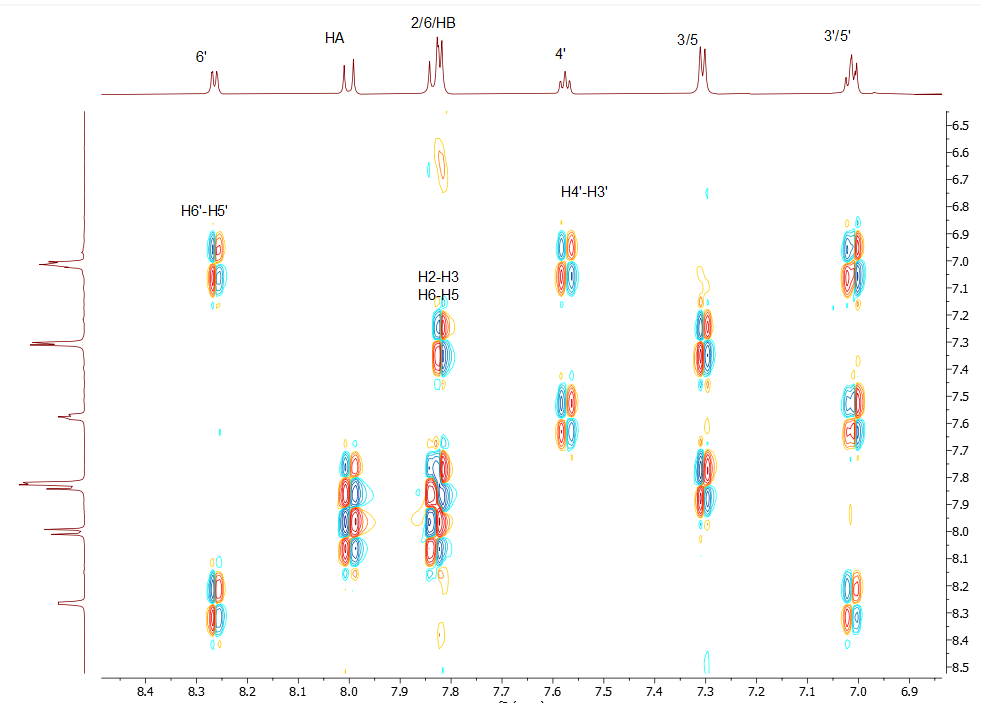


**Figure S1:** 2D-COSY NMR spectrum of compound 1. The spectra were recorded in DMSO-d6 on a Bruker AC 850 MHz spectrometer at 25 oC.


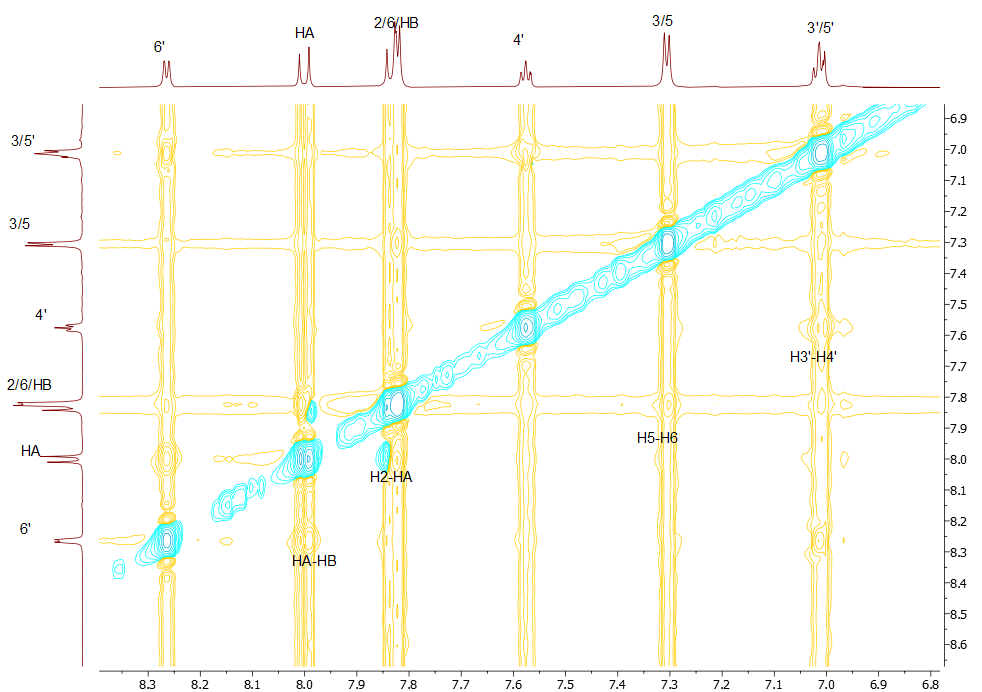


**Figure S2:** 2D-NOESY NMR spectrum of compound 1. The spectra were recorded in DMSO-d6 on a Bruker AC 850 MHz spectrometer at 25 oC.


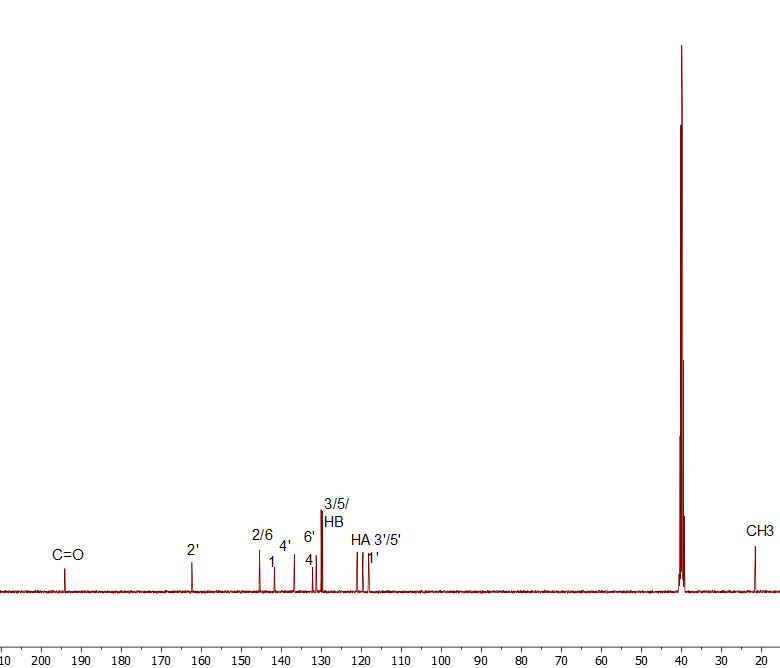


**Figure S3:** 13C NMR spectrum of compound 1. The spectra were recorded in DMSO-d6 on a Bruker AC 850 MHz spectrometer at 25 oC.


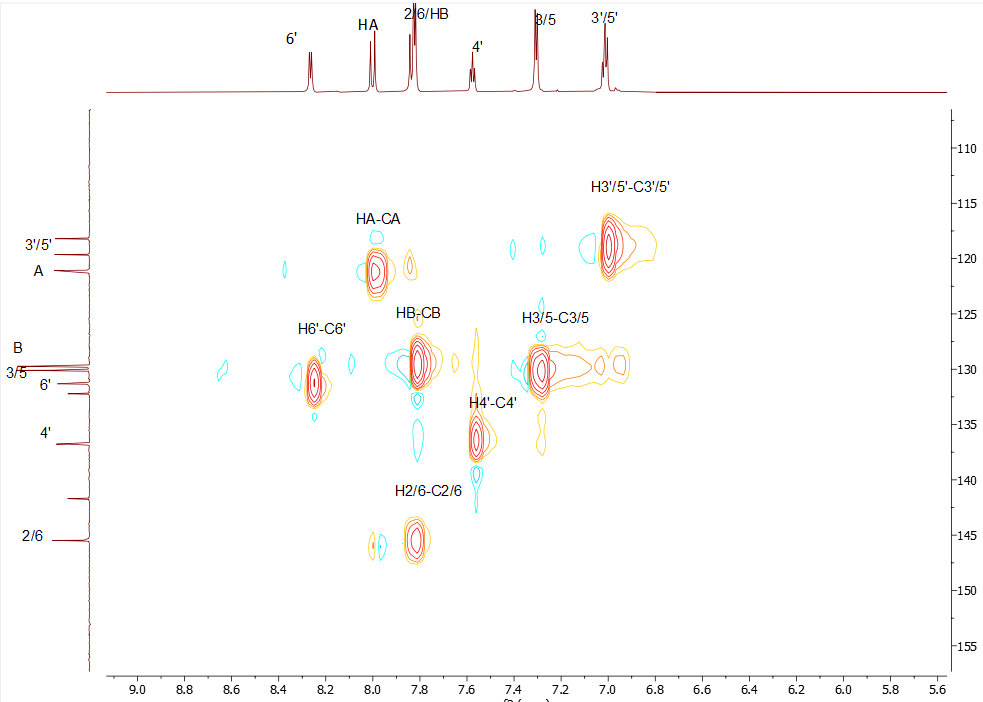


**Figure S4:** 2D-HSQC NMR spectrum of compound 1. The spectra were recorded in DMSO-d6 on a Bruker AC 850 MHz spectrometer at 25 oC.


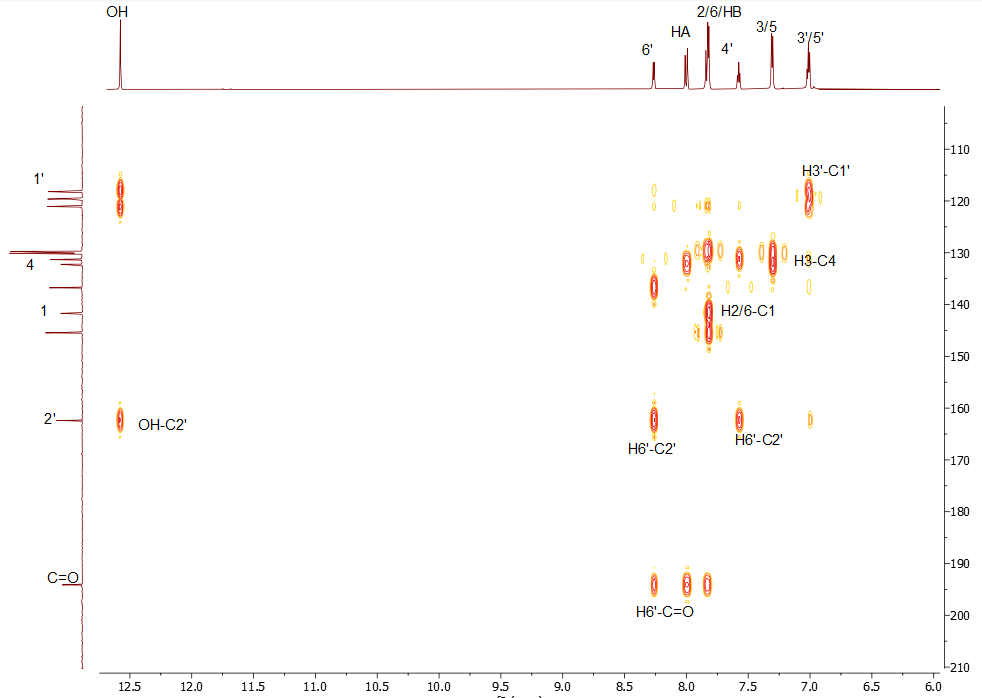


**Figure S5:** 2D-HMBC NMR spectrum of compound 1. The spectra were recorded in DMSO-d6 on a Bruker AC 850 MHz spectrometer at 25 oC.


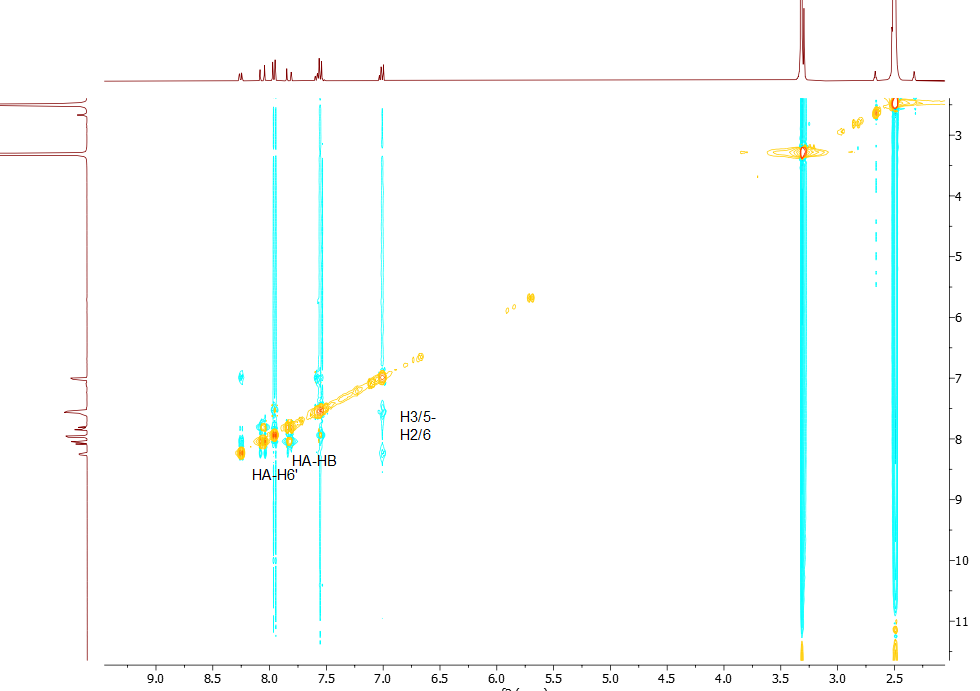


**Figure S6:** 2D-NOESY NMR spectrum of compound 2. The spectra were recorded in DMSO-d6 on a Bruker AC 400 MHz spectrometer at 25 oC.


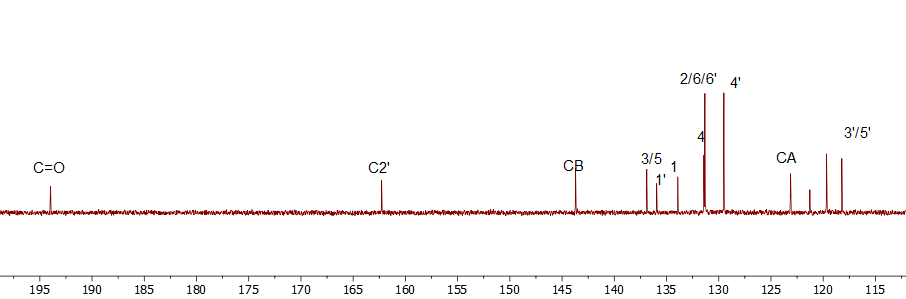


**Figure S7:** 13C NMR spectrum of compound 2. The spectra were recorded in DMSO-d6 on a Bruker AC 400 MHz spectrometer at 25 oC.


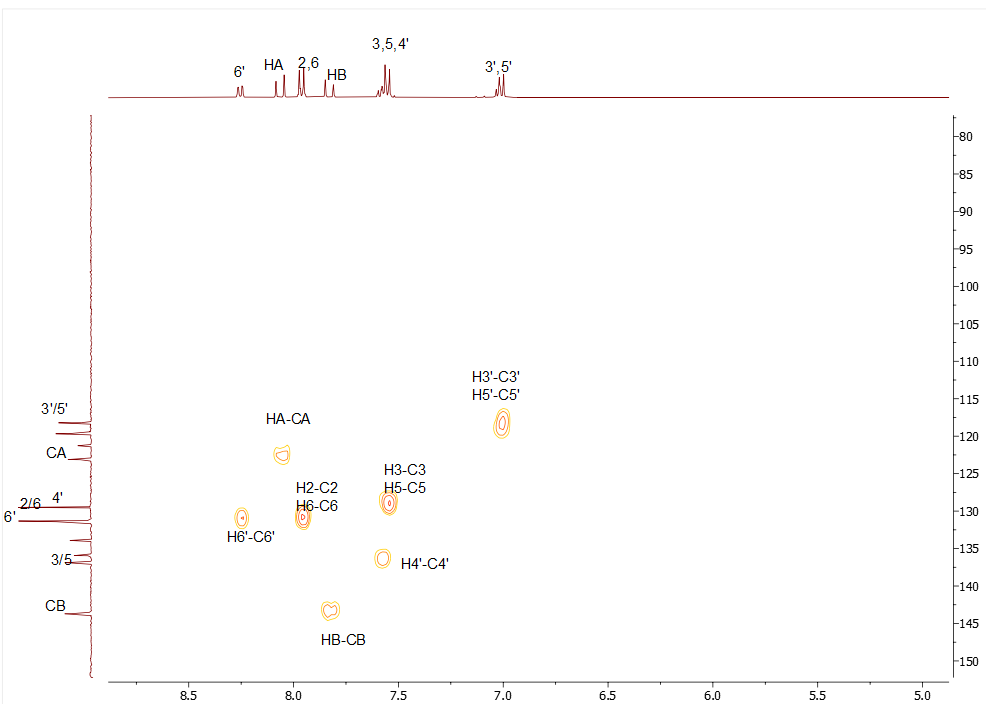


**Figure S8:** 2D-HSQC NMR spectrum of compound 2. The spectra were recorded in DMSO-d6 on a Bruker AC 400 MHz spectrometer at 25 oC.


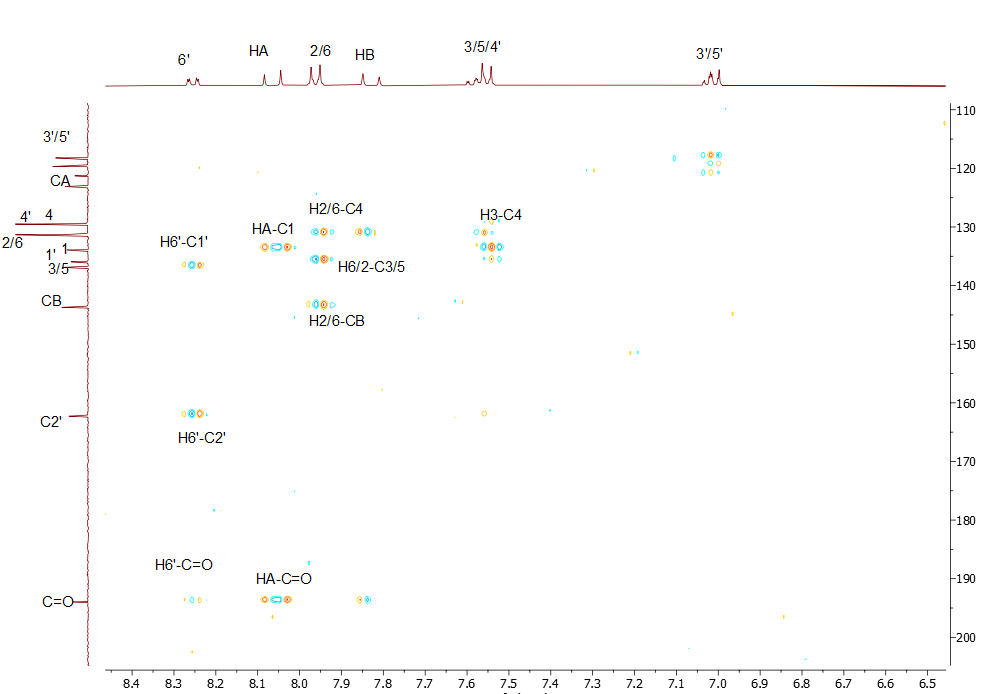


**Figure S9:** 2D-HMBC NMR spectrum of compound 2. The spectra were recorded in DMSO-d6 on a Bruker AC 400 MHz spectrometer at 25 oC.
